# Supplementary material for: Nosocomial and Community-Acquired Spontaneous Bacterial Peritonitis in patients with liver cirrhosis in China: Comparative Microbiology and Therapeutic Implications
Source: PubMed Central journal article supplement (PMC5382543; doi:10.1038/srep46025), 2017-04-06
Supplement: srep46025-s1.pdf [file srep46025-s1.pdf]

# **Nosocomial and Community-Acquired Spontaneous Bacterial Peritonitis in patients with liver cirrhosis in China: Comparative Microbiology and Therapeutic Implications**

Lei Shi<sup>1\*</sup>, Dan Wu<sup>1\*</sup>, Lei Wei<sup>2</sup>, Suxia Liu<sup>3</sup>, Peng Zhao<sup>1</sup>, Bo Tu<sup>1</sup>, Yangxin Xie<sup>1</sup>, Yanan Liu<sup>4</sup>, Xinhua Wang<sup>1</sup>, Liying Liu<sup>5</sup>, Xin Zhang<sup>1</sup>, Zhe Xu<sup>1</sup>, Fusheng Wang<sup>1#</sup>, Enqiang Qin<sup>1#</sup>

1. Treatment and Research Center for Infectious Diseases, Beijing 302 Hospital, Beijing, China.
2. Medical Administration Division, Beijing 302 Hospital, Beijing, China.
3. Blood Purification Center, Beijing 302 Hospital, Beijing, China.
4. Department of Laboratory, Beijing 302 Hospital, Beijing, China.
5. Tumor Radiotherapy Center, Beijing 302 Hospital, Beijing, China.

## **#Correspondence:**

Enqiang Qin, Ph.D., M.D., Treatment and Research Center for Infectious Diseases, 100 the Western 4th Ring Middle Road, Beijing 302 Hospital, Beijing 100039, China.

Email: [geq2004@sina.com](mailto:geq2004@sina.com)

FuSheng Wang, Ph.D., M.D., Treatment and Research Center for Infectious Diseases, 100 the Western 4th Ring Middle Road, Beijing 302 Hospital, Beijing 100039, China.

Email: [fswang302@163.com](mailto:fswang302@163.com)

\* The authors equally contributed to this work.

**Supplement Table 1.** Antibiotic sensitive of G- B bacteria (strains, n)

| Antibiotics                 | <i>Escherichia coli</i> |                         |                         |                         | <i>Klebsiella pneumoniae</i> |                         |                         |                         |
|-----------------------------|-------------------------|-------------------------|-------------------------|-------------------------|------------------------------|-------------------------|-------------------------|-------------------------|
|                             | Community-acquired      |                         | Nosocomial              |                         | Community-acquired           |                         | Nosocomial              |                         |
|                             | (n=83)                  |                         | (n=70)                  |                         | (n=40)                       |                         | (n=35)                  |                         |
|                             | ESBL positive<br>(n=39) | ESBL negative<br>(n=44) | ESBL positive<br>(n=46) | ESBL negative<br>(n=24) | ESBL positive<br>(n=15)      | ESBL negative<br>(n=25) | ESBL positive<br>(n=10) | ESBL negative<br>(n=25) |
| Ampicillin                  | 3                       | 15                      | 0                       | 8                       | 4                            | 1                       | 0                       | 2                       |
| Piperacillin                | 9                       | 26                      | 8                       | 12                      | 4                            | 12                      | 0                       | 19                      |
| Ticarcillin/clavulanic acid | 1                       | 29                      | 2                       | 15                      | 6                            | 13                      | 3                       | 13                      |
| Piperacillin/tazobactam     | 26                      | 37                      | 38                      | 23                      | 13                           | 24                      | 6                       | 25                      |
| Cefoperazone                | 1                       | 40                      | 9                       | 21                      | 10                           | 24                      | 0                       | 23                      |
| Cefoperazone/Sulbactam      | 29                      | 43                      | 35                      | 22                      | 3                            | 25                      | 7                       | 23                      |
| Ceftazidime                 | 6                       | 41                      | 15                      | 22                      | 6                            | 25                      | 0                       | 25                      |
| Ceftriaxone                 | 0                       | 42                      | 1                       | 21                      | 4                            | 25                      | 0                       | 25                      |
| Cefepime                    | 12                      | 42                      | 17                      | 21                      | 15                           | 25                      | 4                       | 24                      |
| Cefmetazole                 | 31                      | 40                      | 42                      | 18                      | 6                            | 25                      | 7                       | 22                      |
| Aztreonam                   | 4                       | 42                      | 12                      | 23                      | 4                            | 25                      | 1                       | 24                      |
| Imipenem                    | 38                      | 43                      | 44                      | 24                      | 15                           | 25                      | 9                       | 25                      |
| Meropenem                   | 38                      | 44                      | 45                      | 24                      | 15                           | 25                      | 9                       | 25                      |
| Amikacin                    | 34                      | 43                      | 41                      | 23                      | 14                           | 24                      | 7                       | 24                      |
| Levofloxacin                | 9                       | 33                      | 15                      | 13                      | 6                            | 23                      | 6                       | 20                      |
| SMZ                         | 9                       | 31                      | 10                      | 2                       | 6                            | 23                      | 3                       | 21                      |
| Fosfomycin                  | 27                      | 42                      | 43                      | 21                      | 12                           | 18                      | 7                       | 23                      |

**Supplement Table 2. Antibiotic Sensitive of G+ C bacteria (strains, n)**

| Antibiotics  | Staphylococcus aureus (n=30) |               |                      |                | Coagulase negative staphylococcus (n=131) |                  |                      |                  | Enterococcus (n=76)       |                          |
|--------------|------------------------------|---------------|----------------------|----------------|-------------------------------------------|------------------|----------------------|------------------|---------------------------|--------------------------|
|              | Community-acquired<br>(n=9)  |               | Nosocomial<br>(n=21) |                | Community-acquired<br>(n=56)              |                  | Nosocomial<br>(n=75) |                  | Nosocomial<br>(n=76)      |                          |
|              | MRSA<br>(n=6)                | MSSA<br>(n=3) | MRSA<br>(n=6)        | MSSA<br>(n=15) | MRSCON<br>(n=40)                          | MSSCON<br>(n=16) | MRSCON<br>(n=61)     | MSSCON<br>(n=14) | <i>Faecalis</i><br>(n=52) | <i>Faecium</i><br>(n=18) |
|              |                              |               |                      |                |                                           |                  |                      |                  |                           |                          |
| SBL          | 0                            | 0             | 0                    | 0              | 0                                         | 7                | 0                    | 7                | 22                        | 13                       |
| Penicillin G | 0                            | 0             | 0                    | 0              | 0                                         | 7                | 0                    | 7                | 48                        | 12                       |
| Ceftriaxone  | 0                            | 3             | 0                    | 15             | 0                                         | 15               | 0                    | 14               | -                         | -                        |
| Cefoxitin    | 0                            | 3             | 0                    | 15             | 0                                         | 16               | 0                    | 13               | -                         | -                        |
| Amikacin     | 3                            | 3             | 2                    | 13             | 22                                        | 16               | 56                   | 12               | -                         | -                        |
| Levofloxacin | 2                            | 1             | 0                    | 13             | 29                                        | 14               | 27                   | 13               | 39                        | 13                       |
| SMZ          | 3                            | 3             | 4                    | 14             | 20                                        | 10               | 25                   | 12               | -                         | -                        |
| Clindamycin  | 2                            | 0             | 3                    | 10             | 22                                        | 11               | 25                   | 13               | -                         | -                        |
| Erythromycin | 3                            | 1             | 4                    | 5              | 15                                        | 5                | 6                    | 7                | 8                         | 7                        |
| Vancomycin   | 6                            | 3             | 6                    | 14             | 40                                        | 16               | 61                   | 14               | 52                        | 17                       |
| Linezolid    | 6                            | 3             | 6                    | 15             | 39                                        | 16               | 60                   | 14               | 51                        | 15                       |
| Teicoplanin  | 6                            | 3             | 6                    | 15             | 40                                        | 16               | 59                   | 14               | 51                        | 18                       |
| Tetracycline | 3                            | 3             | 2                    | 13             | 30                                        | 12               | 45                   | 11               | 2                         | 7                        |
